# Supplementary material
Source: PubMed Central journal article supplement (PMC9089236)
Supplement: NIHMS1746593-supplement-supinfo.pdf [file NIHMS1746593-supplement-supinfo.pdf]

**Table S1.** The features and brain areas/cortical structures that show significant differences among the typically developing controls (TDC), attention-deficit/hyperactivity disorder (ADHD) combined type (ADHD-C), and ADHD inattentive type (ADHD-I) groups.

| Feature category   | Brain area number | Brain area          | Feature name                               | Bonferroni-corrected ANOVA P values | P values in multiple comparison test |                |                   |
|--------------------|-------------------|---------------------|--------------------------------------------|-------------------------------------|--------------------------------------|----------------|-------------------|
|                    |                   |                     |                                            |                                     | TDC vs. ADHD-C                       | TDC vs. ADHD-I | ADHD-C vs. ADHD-I |
| Surface values     | DK-71             | Insula              | cortical thickness                         | 4.76E-02                            | 7.01E-07                             | P > 0.05       | P > 0.05          |
| Radiomics features | AAL-95            | Cerebellum_3_L      | IntensityHistogram-20Percentile            | 6.46E-03                            | 1.60E-07                             | P > 0.05       | P > 0.05          |
| Radiomics features | AAL-95            | Cerebellum_3_L      | IntensityHistogram-25Percentile            | 8.02E-03                            | 2.01E-07                             | P > 0.05       | P > 0.05          |
| Radiomics features | AAL-95            | Cerebellum_3_L      | IntensityHistogram-MedianAbsoluteDeviation | 1.06E-02                            | 2.65E-07                             | P > 0.05       | P > 0.05          |
| Radiomics features | AAL-95            | Cerebellum_3_L      | IntensityHistogram-0.25Quantile            | 3.75E-02                            | 9.92E-07                             | P > 0.05       | P > 0.05          |
| Radiomics features | AAL-91            | Cerebellum_Crus1_L  | IntensityDirect-Energy                     | 2.05E-02                            | 4.28E-07                             | P > 0.05       | 2.63E-02          |
| Radiomics features | AAL-87            | Temporal_Pole_Mid_L | IntensityDirect-LocalEntropyMax            | 4.72E-03                            | 1.06E-07                             | P > 0.05       | 3.44E-02          |
| Radiomics features | AAL-85            | Temporal_Mid_L      | IntensityHistogram-15Percentile            | 7.65E-03                            | 1.96E-07                             | P > 0.05       | P > 0.05          |
| Radiomics features | AAL-85            | Temporal_Mid_L      | IntensityDirect-20Percentile               | 7.85E-03                            | 1.99E-07                             | P > 0.05       | P > 0.05          |
| Radiomics features | AAL-82            | Temporal_Sup_R      | IntensityHistogram-30Percentile            | 5.79E-03                            | 1.45E-07                             | P > 0.05       | P > 0.05          |
| Radiomics features | AAL-82            | Temporal_Sup_R      | IntensityDirect-45Percentile               | 9.19E-03                            | 2.35E-07                             | P > 0.05       | P > 0.05          |
| Radiomics features | AAL-82            | Temporal_Sup_R      | IntensityDirect-40Percentile               | 2.04E-02                            | 4.98E-07                             | P > 0.05       | P > 0.05          |
| Radiomics features | AAL-81            | Temporal_Sup_L      | IntensityDirect-10Percentile               | 3.20E-04                            | 3.31E-09                             | 3.34E-02       | 1.73E-02          |
| Radiomics features | AAL-81            | Temporal_Sup_L      | IntensityHistogram-5Percentile             | 8.86E-03                            | 2.29E-07                             | P > 0.05       | P > 0.05          |
| Radiomics features | AAL-81            | Temporal_Sup_L      | IntensityDirect-15Percentile               | 3.23E-02                            | 7.58E-07                             | P > 0.05       | P > 0.05          |
| Radiomics features | AAL-81            | Temporal_Sup_L      | IntensityHistogram-10Percentile            | 3.28E-02                            | 7.60E-07                             | P > 0.05       | P > 0.05          |
| Radiomics features | AAL-81            | Temporal_Sup_L      | IntensityHistogram-15Percentile            | 3.14E-02                            | 8.98E-07                             | P > 0.05       | P > 0.05          |
| Radiomics features | AAL-81            | Temporal_Sup_L      | IntensityDirect-20Percentile               | 4.16E-02                            | 9.70E-07                             | P > 0.05       | P > 0.05          |
| Radiomics features | AAL-80            | Heschl_R            | IntensityDirect-MedianAbsoluteDeviation    | 9.87E-03                            | 2.21E-07                             | P > 0.05       | 2.73E-03          |
| Radiomics features | AAL-80            | Heschl_R            | IntensityDirect-40Percentile               | 2.88E-03                            | 5.88E-08                             | P > 0.05       | 2.78E-03          |
| Radiomics features | AAL-80            | Heschl_R            | IntensityDirect-25Percentile               | 2.04E-02                            | 4.54E-07                             | P > 0.05       | 4.11E-03          |
| Radiomics features | AAL-80            | Heschl_R            | IntensityDirect-0.25Quantile               | 4.41E-02                            | 1.06E-06                             | P > 0.05       | 4.19E-03          |
| Radiomics features | AAL-80            | Heschl_R            | IntensityDirect-EnergyNorm                 | 1.07E-02                            | 2.22E-07                             | P > 0.05       | 4.71E-03          |
| Radiomics features | AAL-80            | Heschl_R            | IntensityDirect-RootMeanSquare             | 4.03E-02                            | 9.02E-07                             | P > 0.05       | 5.76E-03          |
| Radiomics features | AAL-80            | Heschl_R            | IntensityHistogram-5Percentile             | 4.03E-02                            | 9.02E-07                             | P > 0.05       | 5.76E-03          |
| Radiomics features | AAL-80            | Heschl_R            | IntensityDirect-10Percentile               | 1.68E-02                            | 3.61E-07                             | P > 0.05       | 3.25E-02          |
| Radiomics features | AAL-80            | Heschl_R            | IntensityDirect-Skewness                   | 1.68E-02                            | 3.61E-07                             | P > 0.05       | 3.25E-02          |
| Radiomics features | AAL-80            | Heschl_R            | IntensityHistogram-10Percentile            | 4.81E-03                            | 1.07E-07                             | P > 0.05       | 3.33E-02          |
| Radiomics features | AAL-80            | Heschl_R            | IntensityHistogram-30Percentile            | 2.41E-03                            | 5.97E-08                             | 4.40E-02       | 4.36E-02          |
| Radiomics features | AAL-80            | Heschl_R            | IntensityHistogram-20Percentile            | 1.94E-02                            | 4.40E-07                             | P > 0.05       | 4.42E-02          |
| Radiomics features | AAL-80            | Heschl_R            | IntensityDirect-20Percentile               | 3.59E-02                            | 8.12E-07                             | P > 0.05       | 4.61E-02          |
| Radiomics features | AAL-80            | Heschl_R            | IntensityHistogram-0.25Quantile            | 3.56E-03                            | 8.87E-08                             | 4.66E-02       | 4.78E-02          |
| Radiomics features | AAL-80            | Heschl_R            | IntensityHistogram-25Percentile            | 2.42E-03                            | 2.05E-07                             | 3.07E-03       | P > 0.05          |
| Radiomics features | AAL-80            | Heschl_R            | IntensityDirect-30Percentile               | 3.12E-03                            | 2.05E-07                             | 5.06E-03       | P > 0.05          |
| Radiomics features | AAL-80            | Heschl_R            | IntensityDirect-35Percentile               | 3.97E-03                            | 2.55E-07                             | 5.62E-03       | P > 0.05          |

|                    |        |                   |                                         |          |          |          |          |
|--------------------|--------|-------------------|-----------------------------------------|----------|----------|----------|----------|
| Radiomics features | AAL-80 | Heschl_R          | IntensityHistogram-15Percentile         | 8.86E-03 | 2.29E-07 | P > 0.05 | P > 0.05 |
| Radiomics features | AAL-80 | Heschl_R          | IntensityDirect-15Percentile            | 2.91E-02 | 6.78E-07 | P > 0.05 | P > 0.05 |
| Radiomics features | AAL-79 | Heschl_L          | IntensityDirect-Variance                | 9.28E-03 | 5.73E-05 | 2.29E-05 | P > 0.05 |
| Radiomics features | AAL-79 | Heschl_L          | IntensityHistogram- 5Percentile         | 2.59E-03 | 4.22E-07 | 1.11E-03 | P > 0.05 |
| Radiomics features | AAL-79 | Heschl_L          | IntensityDirect-MeanAbsoluteDeviation   | 1.73E-03 | 2.67E-08 | 1.22E-02 | P > 0.05 |
| Radiomics features | AAL-79 | Heschl_L          | IntensityHistogram-Skewness             | 9.57E-03 | 4.22E-07 | 1.42E-02 | P > 0.05 |
| Radiomics features | AAL-79 | Heschl_L          | IntensityHistogram-0.025Quantile        | 2.39E-02 | 1.05E-06 | 1.78E-02 | P > 0.05 |
| Radiomics features | AAL-79 | Heschl_L          | IntensityDirect-MedianAbsoluteDeviation | 3.31E-03 | 1.10E-07 | 2.08E-02 | P > 0.05 |
| Radiomics features | AAL-79 | Heschl_L          | IntensityDirect-10Percentile            | 2.54E-02 | 9.37E-07 | 2.63E-02 | P > 0.05 |
| Radiomics features | AAL-79 | Heschl_L          | IntensityDirect-15Percentile            | 2.30E-03 | 6.45E-08 | 3.03E-02 | P > 0.05 |
| Radiomics features | AAL-79 | Heschl_L          | IntensityDirect-GlobalStd               | 4.00E-02 | 7.73E-07 | 3.07E-02 | P > 0.05 |
| Radiomics features | AAL-79 | Heschl_L          | IntensityDirect-InterQuartileRange      | 4.51E-02 | 8.90E-07 | 3.10E-02 | P > 0.05 |
| Radiomics features | AAL-79 | Heschl_L          | IntensityDirect-20Percentile            | 4.02E-03 | 1.16E-07 | 3.14E-02 | P > 0.05 |
| Radiomics features | AAL-79 | Heschl_L          | IntensityDirect- 5Percentile            | 4.45E-03 | 1.12E-07 | 4.74E-02 | P > 0.05 |
| Radiomics features | AAL-63 | SupraMarginal_L   | IntensityDirect- 15Percentile           | 3.04E-03 | 1.23E-07 | P > 0.05 | 2.21E-04 |
| Radiomics features | AAL-63 | SupraMarginal_L   | IntensityDirect-MedianAbsoluteDeviation | 9.35E-03 | 1.97E-07 | P > 0.05 | 2.45E-04 |
| Radiomics features | AAL-63 | SupraMarginal_L   | IntensityDirect-InterQuartileRange      | 1.93E-02 | 5.89E-07 | P > 0.05 | 1.15E-03 |
| Radiomics features | AAL-63 | SupraMarginal_L   | IntensityHistogram-10Percentile         | 5.99E-03 | 5.47E-08 | P > 0.05 | 8.45E-03 |
| Radiomics features | AAL-63 | SupraMarginal_L   | IntensityDirect-20Percentile            | 4.42E-02 | 5.12E-07 | P > 0.05 | 1.38E-02 |
| Radiomics features | AAL-63 | SupraMarginal_L   | IntensityHistogram-15Percentile         | 7.01E-03 | 6.70E-08 | P > 0.05 | 1.45E-02 |
| Radiomics features | AAL-63 | SupraMarginal_L   | IntensityDirect-25Percentile            | 7.01E-03 | 6.70E-08 | P > 0.05 | 1.45E-02 |
| Radiomics features | AAL-63 | SupraMarginal_L   | IntensityDirect-30Percentile            | 2.67E-02 | 5.52E-07 | P > 0.05 | 2.42E-02 |
| Radiomics features | AAL-63 | SupraMarginal_L   | IntensityDirect- 0.25Quantile           | 2.42E-02 | 7.05E-07 | 4.56E-02 | P > 0.05 |
| Radiomics features | AAL-63 | SupraMarginal_L   | IntensityHistogram-20Percentile         | 3.88E-02 | 1.14E-06 | 4.98E-02 | P > 0.05 |
| Radiomics features | AAL-39 | ParaHippocampal_L | IntensityDirect-LocalEntropyMedian      | 4.07E-03 | 8.00E-08 | P > 0.05 | 4.64E-03 |
| Radiomics features | AAL-32 | Cingulum_Ant_R    | IntensityHistogram-40Percentile         | 1.26E-02 | 7.01E-07 | P > 0.05 | 2.22E-04 |
| Radiomics features | AAL-32 | Cingulum_Ant_R    | IntensityHistogram-30Percentile         | 1.34E-02 | 5.05E-07 | P > 0.05 | 5.44E-04 |
| Radiomics features | AAL-32 | Cingulum_Ant_R    | IntensityDirect-RootMeanSquare          | 4.06E-02 | 1.02E-06 | P > 0.05 | 3.25E-03 |
| Radiomics features | AAL-32 | Cingulum_Ant_R    | IntensityDirect-75Percentile            | 7.39E-03 | 1.56E-07 | P > 0.05 | 3.39E-03 |
| Radiomics features | AAL-32 | Cingulum_Ant_R    | IntensityDirect-GlobalMean              | 3.83E-04 | 7.74E-09 | P > 0.05 | 3.84E-03 |
| Radiomics features | AAL-32 | Cingulum_Ant_R    | IntensityDirect- 0.75Quantile           | 3.97E-04 | 8.01E-09 | P > 0.05 | 4.56E-03 |
| Radiomics features | AAL-32 | Cingulum_Ant_R    | IntensityDirect-EnergyNorm              | 1.91E-04 | 2.09E-09 | P > 0.05 | 7.52E-03 |
| Radiomics features | AAL-30 | Insula_R          | IntensityHistogram- 5Percentile         | 5.30E-03 | 1.14E-07 | P > 0.05 | 1.53E-04 |
| Radiomics features | AAL-30 | Insula_R          | IntensityHistogram-10Percentile         | 6.09E-03 | 1.32E-07 | P > 0.05 | 1.67E-04 |
| Radiomics features | AAL-30 | Insula_R          | IntensityDirect-LocalEntropyMean        | 3.80E-02 | 1.17E-06 | P > 0.05 | 2.99E-04 |
| Radiomics features | AAL-30 | Insula_R          | IntensityDirect-GlobalUniformity        | 4.13E-02 | 1.09E-06 | P > 0.05 | 4.41E-04 |
| Radiomics features | AAL-30 | Insula_R          | IntensityDirect-45Percentile            | 1.02E-02 | 2.97E-07 | P > 0.05 | 9.59E-04 |
| Radiomics features | AAL-30 | Insula_R          | IntensityDirect-55Percentile            | 1.02E-02 | 2.97E-07 | P > 0.05 | 9.59E-04 |
| Radiomics features | AAL-30 | Insula_R          | IntensityDirect-30Percentile            | 1.41E-02 | 1.86E-07 | P > 0.05 | 1.32E-03 |
| Radiomics features | AAL-30 | Insula_R          | IntensityDirect-25Percentile            | 3.60E-03 | 3.59E-08 | P > 0.05 | 1.34E-03 |

|                    |        |                 |                                           |          |          |          |          |
|--------------------|--------|-----------------|-------------------------------------------|----------|----------|----------|----------|
| Radiomics features | AAL-30 | Insula_R        | IntensityDirect-50Percentile              | 4.04E-02 | 1.32E-06 | P > 0.05 | 1.34E-03 |
| Radiomics features | AAL-30 | Insula_R        | IntensityHistogram-Kurtosis               | 2.88E-03 | 5.88E-08 | P > 0.05 | 2.78E-03 |
| Radiomics features | AAL-30 | Insula_R        | IntensityDirect-40Percentile              | 1.09E-02 | 1.16E-07 | P > 0.05 | 2.91E-03 |
| Radiomics features | AAL-30 | Insula_R        | IntensityDirect-0.025Quantile             | 1.07E-02 | 2.28E-07 | P > 0.05 | 3.79E-03 |
| Radiomics features | AAL-30 | Insula_R        | IntensityHistogram-50Percentile           | 9.50E-03 | 1.95E-07 | P > 0.05 | 4.83E-03 |
| Radiomics features | AAL-30 | Insula_R        | IntensityDirect-35Percentile              | 2.69E-03 | 2.26E-08 | P > 0.05 | 5.00E-03 |
| Radiomics features | AAL-30 | Insula_R        | IntensityHistogram-Skewness               | 1.19E-02 | 2.42E-07 | P > 0.05 | 5.88E-03 |
| Radiomics features | AAL-30 | Insula_R        | IntensityHistogram-15Percentile           | 1.59E-02 | 3.28E-07 | P > 0.05 | 6.49E-03 |
| Radiomics features | AAL-30 | Insula_R        | IntensityDirect-GlobalMedian              | 2.06E-02 | 2.17E-07 | P > 0.05 | 1.02E-02 |
| Radiomics features | AAL-30 | Insula_R        | IntensityDirect-EnergyNorm                | 3.81E-02 | 4.36E-07 | P > 0.05 | 1.04E-02 |
| Radiomics features | AAL-30 | Insula_R        | IntensityDirect-GlobalEntropy             | 3.81E-02 | 4.36E-07 | P > 0.05 | 1.04E-02 |
| Radiomics features | AAL-30 | Insula_R        | IntensityDirect-GlobalStd                 | 4.46E-02 | 5.21E-07 | P > 0.05 | 1.05E-02 |
| Radiomics features | AAL-30 | Insula_R        | IntensityHistogram-45Percentile           | 2.20E-02 | 4.44E-07 | P > 0.05 | 1.06E-02 |
| Radiomics features | AAL-30 | Insula_R        | IntensityDirect-GlobalMean                | 2.71E-02 | 2.96E-07 | P > 0.05 | 1.18E-02 |
| Radiomics features | AAL-30 | Insula_R        | IntensityDirect- 0.25Quantile             | 9.18E-03 | 1.80E-07 | P > 0.05 | 1.20E-02 |
| Radiomics features | AAL-30 | Insula_R        | IntensityHistogram-35Percentile           | 9.18E-03 | 1.80E-07 | P > 0.05 | 1.20E-02 |
| Radiomics features | AAL-30 | Insula_R        | IntensityDirect-RootMeanSquare            | 2.88E-03 | 5.67E-08 | P > 0.05 | 1.35E-02 |
| Radiomics features | AAL-30 | Insula_R        | IntensityHistogram-20Percentile           | 1.41E-02 | 2.81E-07 | P > 0.05 | 1.54E-02 |
| Radiomics features | AAL-30 | Insula_R        | IntensityDirect- 5Percentile              | 3.37E-02 | 6.87E-07 | P > 0.05 | 1.62E-02 |
| Radiomics features | AAL-30 | Insula_R        | IntensityDirect-10Percentile              | 3.37E-02 | 6.87E-07 | P > 0.05 | 1.62E-02 |
| Radiomics features | AAL-30 | Insula_R        | IntensityHistogram-40Percentile           | 4.72E-02 | 9.75E-07 | P > 0.05 | 1.68E-02 |
| Radiomics features | AAL-30 | Insula_R        | IntensityDirect-LocalEntropyStd           | 1.70E-02 | 3.46E-07 | P > 0.05 | 2.03E-02 |
| Radiomics features | AAL-30 | Insula_R        | IntensityDirect-<br>MeanAbsoluteDeviation | 2.65E-02 | 5.41E-07 | P > 0.05 | 2.07E-02 |
| Radiomics features | AAL-30 | Insula_R        | IntensityHistogram-25Percentile           | 2.26E-02 | 4.64E-07 | P > 0.05 | 2.29E-02 |
| Radiomics features | AAL-30 | Insula_R        | IntensityDirect-15Percentile              | 2.68E-02 | 5.53E-07 | P > 0.05 | 2.34E-02 |
| Radiomics features | AAL-30 | Insula_R        | IntensityDirect-20Percentile              | 4.19E-02 | 8.71E-07 | P > 0.05 | 2.38E-02 |
| Radiomics features | AAL-30 | Insula_R        | IntensityDirect-Variance                  | 4.46E-03 | 9.46E-08 | P > 0.05 | 2.57E-02 |
| Radiomics features | AAL-30 | Insula_R        | IntensityDirect- 0.5Quantile              | 2.37E-03 | 5.17E-08 | P > 0.05 | 2.65E-02 |
| Radiomics features | AAL-30 | Insula_R        | IntensityHistogram-60Percentile           | 9.48E-03 | 2.00E-07 | P > 0.05 | 2.75E-02 |
| Radiomics features | AAL-30 | Insula_R        | IntensityHistogram-0.025Quantile          | 8.29E-03 | 1.81E-07 | P > 0.05 | 3.31E-02 |
| Radiomics features | AAL-30 | Insula_R        | IntensityHistogram- 0.5Quantile           | 8.29E-03 | 1.81E-07 | P > 0.05 | 3.31E-02 |
| Radiomics features | AAL-30 | Insula_R        | IntensityHistogram-55Percentile           | 4.29E-03 | 1.05E-07 | P > 0.05 | 4.71E-02 |
| Radiomics features | AAL-30 | Insula_R        | IntensityHistogram-30Percentile           | 4.92E-02 | 1.12E-06 | P > 0.05 | 4.86E-02 |
| Radiomics features | AAL-30 | Insula_R        | IntensityHistogram- 0.25Quantile          | 2.90E-02 | 6.67E-07 | P > 0.05 | 4.89E-02 |
| Radiomics features | AAL-29 | Insula_L        | IntensityDirect-LocalEntropyStd           | 4.79E-02 | 1.17E-06 | P > 0.05 | 5.84E-04 |
| Radiomics features | AAL-29 | Insula_L        | IntensityDirect-<br>MeanAbsoluteDeviation | 4.79E-02 | 1.08E-06 | P > 0.05 | 6.94E-04 |
| Radiomics features | AAL-29 | Insula_L        | IntensityHistogram-Skewness               | 1.29E-02 | 2.70E-07 | P > 0.05 | 4.93E-03 |
| Radiomics features | AAL-29 | Insula_L        | IntensityDirect-0.025Quantile             | 9.48E-03 | 1.87E-07 | P > 0.05 | 7.75E-03 |
| Radiomics features | AAL-29 | Insula_L        | IntensityDirect-LocalEntropyMean          | 2.46E-02 | 2.65E-07 | P > 0.05 | 1.12E-02 |
| Radiomics features | AAL-29 | Insula_L        | IntensityDirect-Variance                  | 3.41E-02 | 3.83E-07 | P > 0.05 | 1.36E-02 |
| Radiomics features | AAL-29 | Insula_L        | IntensityDirect-GlobalStd                 | 2.81E-02 | 5.71E-07 | P > 0.05 | 1.81E-02 |
| Radiomics features | AAL-18 | Rolandic_Oper_R | IntensityDirect- 0.25Quantile             | 2.81E-02 | 5.71E-07 | P > 0.05 | 1.81E-02 |

|                    |         |                    |                                                    |          |          |          |          |
|--------------------|---------|--------------------|----------------------------------------------------|----------|----------|----------|----------|
| Radiomics features | AAL-18  | Rolandic_Oper_R    | IntensityDirect-35Percentile                       | 1.13E-02 | 2.28E-07 | P > 0.05 | 1.88E-02 |
| Radiomics features | AAL-18  | Rolandic_Oper_R    | IntensityDirect-40Percentile                       | 1.77E-02 | 3.59E-07 | P > 0.05 | 1.98E-02 |
| Radiomics features | AAL-18  | Rolandic_Oper_R    | IntensityHistogram-20Percentile                    | 4.76E-02 | 9.84E-07 | P > 0.05 | 2.03E-02 |
| Radiomics features | AAL-18  | Rolandic_Oper_R    | IntensityDirect-30Percentile                       | 6.07E-03 | 1.24E-07 | P > 0.05 | 2.09E-02 |
| Radiomics features | AAL-18  | Rolandic_Oper_R    | IntensityHistogram-15Percentile                    | 4.92E-02 | 1.03E-06 | P > 0.05 | 2.47E-02 |
| Radiomics features | AAL-18  | Rolandic_Oper_R    | IntensityDirect-25Percentile                       | 5.64E-03 | 1.18E-07 | P > 0.05 | 2.50E-02 |
| Radiomics features | AAL-18  | Rolandic_Oper_R    | IntensityHistogram-25Percentile                    | 3.36E-03 | 7.53E-08 | P > 0.05 | 3.19E-02 |
| Radiomics features | AAL-18  | Rolandic_Oper_R    | IntensityDirect-InterQuartileRange                 | 9.32E-03 | 2.03E-07 | P > 0.05 | 3.27E-02 |
| Radiomics features | AAL-18  | Rolandic_Oper_R    | IntensityHistogram- 0.25Quantile                   | 9.32E-03 | 2.03E-07 | P > 0.05 | 3.27E-02 |
| Radiomics features | AAL-18  | Rolandic_Oper_R    | IntensityDirect-EnergyNorm                         | 6.16E-03 | 1.49E-07 | P > 0.05 | 4.79E-02 |
| Radiomics features | AAL-18  | Rolandic_Oper_R    | IntensityDirect-RootMeanSquare                     | 1.04E-02 | 2.48E-07 | P > 0.05 | 4.88E-02 |
| Radiomics features | AAL-17  | Rolandic_Oper_L    | IntensityDirect-InterQuartileRange                 | 1.60E-02 | 3.27E-07 | P > 0.05 | 2.17E-02 |
| Radiomics features | AAL-17  | Rolandic_Oper_L    | IntensityDirect-MedianAbsoluteDeviation            | 2.05E-02 | 4.28E-07 | P > 0.05 | 2.63E-02 |
| Radiomics features | AAL-17  | Rolandic_Oper_L    | IntensityDirect- 0.25Quantile                      | 2.05E-02 | 4.28E-07 | P > 0.05 | 2.63E-02 |
| Radiomics features | AAL-17  | Rolandic_Oper_L    | IntensityDirect-15Percentile                       | 3.86E-02 | 8.06E-07 | P > 0.05 | 2.64E-02 |
| Radiomics features | AAL-17  | Rolandic_Oper_L    | IntensityDirect-20Percentile                       | 4.33E-03 | 9.50E-08 | P > 0.05 | 3.05E-02 |
| Radiomics features | AAL-17  | Rolandic_Oper_L    | IntensityHistogram-10Percentile                    | 4.81E-03 | 1.07E-07 | P > 0.05 | 3.33E-02 |
| Radiomics features | AAL-17  | Rolandic_Oper_L    | IntensityDirect-25Percentile                       | 1.08E-02 | 2.53E-07 | P > 0.05 | 4.52E-02 |
| Radiomics features | AAL-17  | Rolandic_Oper_L    | IntensityHistogram-15Percentile                    | 7.85E-03 | 1.88E-07 | P > 0.05 | 4.75E-02 |
| Radiomics features | AAL-12  | Frontal_Inf_Oper_R | IntensityHistogram-35Percentile                    | 1.03E-02 | 2.11E-07 | P > 0.05 | 2.19E-02 |
| Radiomics features | AAL-12  | Frontal_Inf_Oper_R | IntensityHistogram-30Percentile                    | 6.48E-03 | 1.38E-07 | P > 0.05 | 2.77E-02 |
| Radiomics features | AAL-106 | Cerebelum_9_R      | GrayLevelRunLengthMatrix-90GrayLevelNonuniformity  | 9.68E-03 | 2.15E-07 | P > 0.05 | 3.65E-02 |
| Radiomics features | AAL-106 | Cerebelum_9_R      | GrayLevelRunLengthMatrix--GrayLevelNonuniformity   | 1.23E-02 | 2.74E-07 | P > 0.05 | 3.84E-02 |
| Radiomics features | AAL-106 | Cerebelum_9_R      | GrayLevelRunLengthMatrix-0GrayLevelNonuniformity   | 1.08E-02 | 2.53E-07 | P > 0.05 | 4.52E-02 |
| Radiomics features | AAL-105 | Cerebelum_9_L      | GrayLevelRunLengthMatrix-0LongRunLowGrayLevelEmpha | 1.84E-02 | 4.00E-07 | P > 0.05 | 3.52E-02 |
| Radiomics features | AAL-105 | Cerebelum_9_L      | GrayLevelRunLengthMatrix--LongRunLowGrayLevelEmpha | 7.85E-03 | 1.88E-07 | P > 0.05 | 4.75E-02 |

**Table S2.** The features that showed significant differences in the association of brain and age between typically developing controls (TDC) and patients with attention-deficit/hyperactivity disorder (ADHD).

| Feature categories           | Feature names                | Corrected P values     |
|------------------------------|------------------------------|------------------------|
| Volumetric measurements      | Gray matter volume           | $4.36 \times 10^{-13}$ |
|                              | White matter volume          | $9.12 \times 10^{-23}$ |
| Surface values               | Sqrtsulc                     | 0.01                   |
|                              | Cortical thickness           | $4.49 \times 10^{-8}$  |
| Radiomics features           | First-order-EnergyNorm       | $7.17 \times 10^{-5}$  |
|                              | First-order-GlobalEntropy    | $1.79 \times 10^{-3}$  |
|                              | First-order-GlobalMean       | $8.83 \times 10^{-3}$  |
|                              | First-order-LocalEntropyMax  | $1.64 \times 10^{-6}$  |
|                              | First-order-LocalEntropyMean | $1.73 \times 10^{-5}$  |
|                              | First-order-LocalEntropyStd  | $1.59 \times 10^{-4}$  |
|                              | First-order-LocalRangeMax    | 0.01                   |
|                              | First-order-LocalRangeMedian | $1.11 \times 10^{-4}$  |
|                              | First-order-LocalRangeStd    | $4.00 \times 10^{-3}$  |
|                              | First-order-LocalStdMedian   | $9.10 \times 10^{-6}$  |
|                              | First-order-65Percentile     | 0.04                   |
|                              | First-order-70Percentile     | $7.78 \times 10^{-3}$  |
|                              | First-order-75Percentile     | $1.63 \times 10^{-3}$  |
|                              | First-order-80Percentile     | $4.59 \times 10^{-4}$  |
|                              | First-order-85Percentile     | $1.15 \times 10^{-4}$  |
|                              | First-order-90Percentile     | $1.21 \times 10^{-4}$  |
|                              | First-order-95Percentile     | $7.22 \times 10^{-4}$  |
|                              | First-order-0.75Quantile     | $1.63 \times 10^{-3}$  |
|                              | First-order-0.975Quantile    | $6.60 \times 10^{-3}$  |
|                              | First-order-RootMeanSquare   | $7.17 \times 10^{-5}$  |
| First-order-70PercentileArea | 0.02                         |                        |

|  |                                              |                        |
|--|----------------------------------------------|------------------------|
|  | First-order-75PercentileArea                 | $8.68 \times 10^{-3}$  |
|  | First-order-80PercentileArea                 | $1.44 \times 10^{-3}$  |
|  | First-order-85PercentileArea                 | $7.83 \times 10^{-4}$  |
|  | First-order-90PercentileArea                 | $2.34 \times 10^{-3}$  |
|  | First-order-95PercentileArea                 | $1.62 \times 10^{-4}$  |
|  | First-order-0.975Quantile                    | 0.03                   |
|  | First-order-Range                            | $5.02 \times 10^{-12}$ |
|  | Texture-GLRLM-<br>90LongRunLowGrayLevelEmpha | $7.52 \times 10^{-3}$  |
|  | Texture-GLRLM-<br>90LowGrayLevelRunEmpha     | $8.48 \times 10^{-3}$  |

**Table S3.** The classification results of typically developing controls (TDC) and patients with attention-deficit/hyperactivity disorder (ADHD).

| Feature Category    | Training set                    |              |              |              | Testing set                     |              |              |              |
|---------------------|---------------------------------|--------------|--------------|--------------|---------------------------------|--------------|--------------|--------------|
|                     | AUC<br>(95% CI)                 | sen<br>(%)   | spe<br>(%)   | acc<br>(%)   | AUC<br>(95% CI)                 | sen<br>(%)   | spe<br>(%)   | acc<br>(%)   |
| Clinical factors    | 0.75 (95% CI:0.69-0.81)         | 62.10        | 79.20        | 70.95        | 0.74 (95% CI:0.63-0.86)         | 57.14        | 86.67        | 73.75        |
| Gray matter volume  | 0.71 (95% CI:0.64-0.77)         | 64.66        | 70.40        | 67.64        | 0.63 (95% CI:0.50-.076)         | 57.14        | 73.33        | 66.25        |
| White matter volume | 0.76 (95% CI:0.70-0.82)         | 76.72        | 66.40        | 71.37        | 0.66 (95% CI:0.54-0.78)         | 88.57        | 46.67        | 65.00        |
| Surface values      | 0.80 (95% CI:0.75-0.86)         | 83.62        | 63.20        | 73.02        | 0.72 (95% CI:0.61-0.84)         | 68.57        | 71.11        | 70.00        |
| Radiomics features  | 0.78 (95% CI:0.73-0.84)         | 83.62        | 56.00        | 69.29        | 0.79 (95% CI:0.69-0.90)         | 82.85        | 71.11        | 76.25        |
| <i>Combination</i>  | <i>0.82 (95% CI: 0.77-0.87)</i> | <i>61.21</i> | <i>89.60</i> | <i>75.93</i> | <i>0.83 (95% CI: 0.73-0.92)</i> | <i>68.57</i> | <i>93.33</i> | <i>82.50</i> |

95% CI: 95% confidence intervals; acc: accuracy; AUC: area under curve; sen: sensitivity; spe: specificity.

**Table S4.** The features that were selected by Lasso method for the classification of typically developing controls (TDC) and patients with attention-deficit/hyperactivity disorder (ADHD).

| <b>Models</b>             | <b>Brain area numbers</b>                                                                                                                                                                    | <b>Brain area names</b>                                                                                                                                                                                                                                                                                                                                                                                                                                   | <b>Feature names</b> |
|---------------------------|----------------------------------------------------------------------------------------------------------------------------------------------------------------------------------------------|-----------------------------------------------------------------------------------------------------------------------------------------------------------------------------------------------------------------------------------------------------------------------------------------------------------------------------------------------------------------------------------------------------------------------------------------------------------|----------------------|
| <i>Clinical model</i>     | --                                                                                                                                                                                           | --                                                                                                                                                                                                                                                                                                                                                                                                                                                        | Gender               |
|                           | --                                                                                                                                                                                           | --                                                                                                                                                                                                                                                                                                                                                                                                                                                        | Age                  |
|                           | --                                                                                                                                                                                           | --                                                                                                                                                                                                                                                                                                                                                                                                                                                        | Verbal IQ            |
|                           | --                                                                                                                                                                                           | --                                                                                                                                                                                                                                                                                                                                                                                                                                                        | Performance IQ       |
| <i>Gray matter model</i>  | AAL: 41, 58, 79                                                                                                                                                                              | Amygdala_L, Postcentral_R, Heschl_L                                                                                                                                                                                                                                                                                                                                                                                                                       | Gray matter volume   |
| <i>White matter model</i> | AAL: 1, 2, 3, 4, 5, 7, 8, 9, 10, 11, 12, 13, 14, 16, 17, 18, 19, 20, 21, 22, 23, 24, 25, 26, 27, 28, 29, 30, 31, 32, 33, 34, 35, 37, 38, 39, 40, 41, 44, 45, 46, 48, 50, 51, 52, 54, 55, 56, | Precentral_L, Precentral_R, Frontal_Sup_L, Frontal_Sup_R, Frontal_Sup_Orb_L, Frontal_Mid_L, Frontal_Mid_R, Frontal_Mid_Orb_L, Frontal_Mid_Orb_R, Frontal_Inf_Oper_L, Frontal_Inf_Oper_R, Frontal_Inf_Tri_L, Frontal_Inf_Tri_R, Frontal_Inf_Orb_R, Rolandic_Oper_L, Rolandic_Oper_R, Supp_Motor_Area_L, Supp_Motor_Area_R, Olfactory_L, Olfactory_R, Frontal_Sup_Medial_L, Frontal_Sup_Medial_R, Frontal_Med_Orb_L, Frontal_Med_Orb_R, Rectus_L, Rectus_R, | White matter volume  |



|  |                                                                                                                                                                                                                                                                                               |                                                                                                                                                                                                                                                                                                                                                                                                                                                                                                                                                                                                                                                                                                                                                                                                                                                                                                                                                                                                         |  |
|--|-----------------------------------------------------------------------------------------------------------------------------------------------------------------------------------------------------------------------------------------------------------------------------------------------|---------------------------------------------------------------------------------------------------------------------------------------------------------------------------------------------------------------------------------------------------------------------------------------------------------------------------------------------------------------------------------------------------------------------------------------------------------------------------------------------------------------------------------------------------------------------------------------------------------------------------------------------------------------------------------------------------------------------------------------------------------------------------------------------------------------------------------------------------------------------------------------------------------------------------------------------------------------------------------------------------------|--|
|  | <p>57, 58, 59, 60, 61, 62,<br/>63, 64, 65, 66, 67, 69,<br/>70, 71, 72, 74, 75, 76,<br/>77, 79, 80, 81, 82, 83,<br/>84, 85, 86, 87, 88, 89,<br/>90, 91, 92, 93, 94, 95,<br/>96, 97, 98, 99, 100,<br/>101, 102, 104, 105,<br/>106, 107, 108, 109,<br/>110, 111, 112, 113,<br/>114, 115, 116</p> | <p>Insula_L, Insula_R, Cingulum_Ant_L, Cingulum_Ant_R,<br/>Cingulum_Mid_L, Cingulum_Mid_R, Cingulum_Post_L,<br/>Hippocampus_L, Hippocampus_R, ParaHippocampal_L,<br/>ParaHippocampal_R, Amygdala_L, Calcarine_R, Cuneus_L,<br/>Cuneus_R, Lingual_R, Occipital_Sup_R, Occipital_Mid_L,<br/>Occipital_Mid_R, Occipital_Inf_R, Fusiform_L, Fusiform_R,<br/>Postcentral_L, Postcentral_R, Parietal_Sup_L, Parietal_Sup_R,<br/>Parietal_Inf_L, Parietal_Inf_R, SupraMarginal_L,<br/>SupraMarginal_R, Angular_L, Angular_R, Precuneus_L,<br/>Paracentral_Lobule_L, Paracentral_Lobule_R, Caudate_L,<br/>Caudate_RPutamen_R, Pallidum_L, Pallidum_R, Thalamus_L,<br/>Heschl_L, Heschl_R, Temporal_Sup_L, Temporal_Sup_R,<br/>Temporal_Pole_Sup_L, Temporal_Pole_Sup_R, Temporal_Mid_L,<br/>Temporal_Mid_R, Temporal_Pole_Mid_L,<br/>Temporal_Pole_Mid_R, Temporal_Inf_L, Temporal_Inf_R,<br/>Cerebelum_Crus1_L, Cerebelum_Crus1_R, Cerebelum_Crus2_L,<br/>Cerebelum_Crus2_R, Cerebelum_3_L, Cerebelum_3_R,</p> |  |
|--|-----------------------------------------------------------------------------------------------------------------------------------------------------------------------------------------------------------------------------------------------------------------------------------------------|---------------------------------------------------------------------------------------------------------------------------------------------------------------------------------------------------------------------------------------------------------------------------------------------------------------------------------------------------------------------------------------------------------------------------------------------------------------------------------------------------------------------------------------------------------------------------------------------------------------------------------------------------------------------------------------------------------------------------------------------------------------------------------------------------------------------------------------------------------------------------------------------------------------------------------------------------------------------------------------------------------|--|

|                            |                         |                                                                                                                                                                                                                                                                              |                              |
|----------------------------|-------------------------|------------------------------------------------------------------------------------------------------------------------------------------------------------------------------------------------------------------------------------------------------------------------------|------------------------------|
|                            |                         | Cerebelum_4_5_L, Cerebelum_4_5_R, Cerebelum_6_L,<br>Cerebelum_6_R, Cerebelum_7b_L, Cerebelum_7b_R,<br>Cerebelum_8_R, Cerebelum_9_L, Cerebelum_9_R,<br>Cerebelum_10_L, Cerebelum_10_R, Vermis_1_2, Vermis_3,<br>Vermis_4_5, Vermis_6, Vermis_7, Vermis_8, Vermis_9, Vermis_10 |                              |
| <b>Surface value model</b> | DK40: 23, 32, 36        | Llateraloccipital, rmiddletemporal, rparacentral                                                                                                                                                                                                                             | Fractal dimension            |
|                            | DK40: 6, 16, 21, 56, 62 | Rcaudalanteriorcingulate, rfusiform, listhmuscingulate,<br>rrostralmiddlefrontal, rsuperiortemporal                                                                                                                                                                          | Gyrification                 |
|                            | DK40: 20, 29, 52, 58    | Rinferiortemporal, lmedialorbitofrontal, rprecuneus,<br>rsuperiorfrontal                                                                                                                                                                                                     | sqrtsulc                     |
|                            | DK40: 21, 46, 71        | Listhmuscingulate, rpostcentral, linsula                                                                                                                                                                                                                                     | Cortical thickness           |
| <b>Radiomics model</b>     | AAL-020                 | Supp_Motor_Area_R                                                                                                                                                                                                                                                            | First-order-LocalRangeMax    |
|                            | AAL_021                 | Olfactory_L                                                                                                                                                                                                                                                                  | First-order-80Percentile     |
|                            | AAL_030                 | Insula_R                                                                                                                                                                                                                                                                     | First-order-GlobalUniformity |
|                            | AAL_087                 | Temporal_Pole_Mid_L                                                                                                                                                                                                                                                          | First-order-LocalEntropyMax  |
|                            | AAL_088                 | Temporal_Pole_Mid_R                                                                                                                                                                                                                                                          | First-order-LocalStdMean     |

|                                                      |         |                     |                                           |
|------------------------------------------------------|---------|---------------------|-------------------------------------------|
|                                                      | AAL_091 | Cerebelum_Crus1_L   | First-order-Energy                        |
|                                                      | AAL_097 | Cerebelum_4_5_L     | First-order-10Percentile                  |
|                                                      | AAL_106 | Cerebelum_9_R       | Texture-GLCM-<br>GrayLevelNonuniformity   |
|                                                      | AAL_106 | Cerebelum_9_R       | Texture-GLRLM-<br>0GrayLevelNonuniformity |
| <b>Combined<br/>model<br/>Radiomics<br/>features</b> | AAL_020 | Supp_Motor_Area_R   | First-order-LocalRangeMax                 |
|                                                      | AAL_030 | Insula_R            | First-order-GlobalUniformity              |
|                                                      | AAL_032 | Cingulum_Ant_R      | First-order-<br>LocalEntropyMedian        |
|                                                      | AAL_081 | Temporal_Sup_L      | First-order-5Percentile                   |
|                                                      | AAL_087 | Temporal_Pole_Mid_L | First-order-LocalEntropyMax               |
|                                                      | AAL_091 | Cerebelum_Crus1_L   | First-order-Energy                        |
|                                                      | AAL_097 | Cerebelum_4_5_L     | First-order-GlobalMax                     |
|                                                      | AAL_097 | Cerebelum_4_5_L     | First-order-10Percentile                  |
|                                                      | AAL_106 | Cerebelum_9_R       | Texture-GLRLM-                            |

|                       |         |                   |                                           |
|-----------------------|---------|-------------------|-------------------------------------------|
|                       |         |                   | GrayLevelNonuniformity                    |
|                       | AAL_106 | Cerebelum_9_R     | Texture-GLRLM-<br>0GrayLevelNonuniformity |
| Surface values        | DK40_32 | Rmiddletemporal   | Fractal dimension                         |
|                       | DK40_62 | Rsuperiortemporal | Gyrification                              |
|                       | DK40_71 | linsula           | Cortical thickness                        |
| Gray matter<br>volume | AAL_58  | Postcentral_R     | Gray matter volume                        |
| Clinical factors      | --      | --                | Gender                                    |
|                       | --      | --                | Performance IQ                            |

AAL: automated anatomical labeling; DK: Desikan-Killiany; GLCM: gray-level co-occurrence matrix; GLRLM: gray-level run length matrix; IQ: intelligence quotient.

**Table S5.** The classification results of patients with attention-deficit/hyperactivity disorder (ADHD) inattentive type (ADHD-I) and patients with ADHD combined type (ADHD-C).

| Feature Category    | Training set                    |              |              |              | Testing set                     |              |              |              |
|---------------------|---------------------------------|--------------|--------------|--------------|---------------------------------|--------------|--------------|--------------|
|                     | AUC<br>(95% CI)                 | sen<br>(%)   | spe<br>(%)   | acc<br>(%)   | AUC<br>(95% CI)                 | sen<br>(%)   | spe<br>(%)   | acc<br>(%)   |
| Clinical factors    | 0.69 (95% CI:0.58-0.79)         | 56.52        | 79.41        | 70.18        | 0.65 (95% CI:0.46-0.84)         | 84.21        | 55.56        | 70.27        |
| Gray matter volume  | 0.75 (95% CI:0.66-0.85)         | 86.96        | 54.41        | 67.54        | 0.66 (95% CI:0.47-0.85)         | 94.74        | 50.00        | 72.97        |
| White matter volume | 0.69 (95% CI:0.58-0.79)         | 67.39        | 69.12        | 68.42        | 0.61 (95% CI:0.42-0.79)         | 57.90        | 66.67        | 62.16        |
| Surface values      | 0.73 (95% CI:0.63-0.83)         | 45.65        | 95.59        | 75.44        | 0.60 (95% CI:0.40-0.79)         | 57.90        | 72.22        | 64.87        |
| Radiomics features  | 0.94 (95% CI:0.91-0.99)         | 95.65        | 85.29        | 89.47        | 0.85 (95% CI:0.72-0.98)         | 84.21        | 83.33        | 83.78        |
| <i>Combination</i>  | <i>0.94 (95% CI: 0.90-0.98)</i> | <i>89.13</i> | <i>85.29</i> | <i>86.84</i> | <i>0.83 (95% CI: 0.69-0.97)</i> | <i>94.74</i> | <i>66.67</i> | <i>81.08</i> |

95% CI: 95% confidence intervals; acc: accuracy; AUC: area under curve; sen: sensitivity; spe: specificity.

**Table S6.** The features that were selected by Lasso method for the classification of patients with attention-deficit/hyperactivity disorder (ADHD) inattentive type (ADHD-I) and patients with ADHD combined type (ADHD-C).

| <b>Models</b>              | <b>Brain area numbers</b>         | <b>Brain area names</b>                                                                        | <b>Feature names</b>                       |
|----------------------------|-----------------------------------|------------------------------------------------------------------------------------------------|--------------------------------------------|
| <i>Clinical model</i>      | --                                | --                                                                                             | Gender                                     |
|                            | --                                | --                                                                                             | Age                                        |
|                            | --                                | --                                                                                             | Verbal IQ                                  |
| <i>Gray matter model</i>   | AAL: 20, 33, 42, 72, 80, 101, 116 | Supp_Motor_Area_R, Cingulum_Mid_L, Amygdala_R, Caudate_R, Heschl_R, Cerebellum_7b_L, Vermis_10 | Gray matter volume                         |
| <i>White matter model</i>  | AAL: 65, 81                       | Angular_L, Temporal_Sup_L                                                                      | White matter volume                        |
| <i>Surface value model</i> | DK40: 6                           | Rcaudalanteriorcingulate                                                                       | sqrtsulc                                   |
|                            | DK40: 4, 12                       | Rbankssts, rcuneus                                                                             | Cortical thickness                         |
| <i>Radiomics model</i>     | AAL-006                           | Frontal_Sup_Orb_R                                                                              | Texture-GLCM-7InformationMeasureCorr1      |
|                            | AAL_010                           | Frontal_Mid_Orb_R                                                                              | Texture-GLRLM-90ShortRunEmphasis           |
|                            | AAL_010                           | Frontal_Mid_Orb_R                                                                              | Texture-GLRLM-ShortRunLowGrayLevelEmphasis |

|  |         |                   |                                     |
|--|---------|-------------------|-------------------------------------|
|  | AAL_014 | Frontal_Inf_Tri_R | First-order-GlobalMax               |
|  | AAL_014 | Frontal_Inf_Tri_R | First-order-Range                   |
|  | AAL_035 | Cingulum_Post_L   | First-order-35Percentile            |
|  | AAL_035 | Cingulum_Post_L   | First-order-InterQuartileRange      |
|  | AAL_037 | Hippocampus_L     | Texture-NIDM- Busyness              |
|  | AAL_041 | Amygdala_L        | First-order-75Percentile            |
|  | AAL_041 | Amygdala_L        | First-order-0.75Quantile            |
|  | AAL-042 | Amygdala_R        | First-order-GlobalMax               |
|  | AAL_044 | Calcarine_R       | First-order-LocalRangeMin           |
|  | AAL_048 | Lingual_R         | First-order-80Percentile            |
|  | AAL_049 | Occipital_Sup_L   | First-order-Energy                  |
|  | AAL_049 | Occipital_Sup_L   | First-order-LocalRangeMean          |
|  | AAL_049 | Occipital_Sup_L   | First-order-70Percentile            |
|  | AAL_051 | Occipital_Mid_L   | Texture-NIDM-Busyness               |
|  | AAL_063 | SupraMarginal_L   | First-order-MedianAbsoluteDeviation |

|                                                    |         |                      |                                             |
|----------------------------------------------------|---------|----------------------|---------------------------------------------|
|                                                    | AAL_069 | Paracentral_Lobule_L | First-order-0.975Quantile                   |
|                                                    | AAL_071 | Caudate_L            | First-order-LocalStdMin                     |
|                                                    | AAL_095 | Cerebellum_3_L       | First-order-0.975Quantile                   |
|                                                    | AAL_109 | Vermis_1_2           | First-order-Skewness                        |
|                                                    | AAL_113 | Vermis_7             | First-order-0.025Quantile                   |
| <b><i>Combined model</i></b><br>Radiomics features | AAL-006 | Frontal_Sup_Orb_R    | Texture-GLCM-7InformationMeasureCorr1       |
|                                                    | AAL_010 | Frontal_Mid_Orb_R    | Texture-GLRLM-90ShortRunEmphasis            |
|                                                    | AAL_010 | Frontal_Mid_Orb_R    | Texture-GLRLM-<br>ShortRunLowGrayLevelEmpha |
|                                                    | AAL_014 | Frontal_Inf_Tri_R    | First-order-GlobalMax                       |
|                                                    | AAL_014 | Frontal_Inf_Tri_R    | First-order-Range                           |
|                                                    | AAL_035 | Cingulum_Post_L      | First-order-35Percentile                    |
|                                                    | AAL_035 | Cingulum_Post_L      | First-order-InterQuartileRange              |
|                                                    | AAL_037 | Hippocampus_L        | Texture-NIDM-Busyness                       |
|                                                    | AAL_041 | Amygdala_L           | First-order-75Percentile                    |
|                                                    | AAL_041 | Amygdala_L           | First-order-0.75Quantile                    |



|                  |         |                      |                            |
|------------------|---------|----------------------|----------------------------|
| Clinical factors | AAL-044 | Calcarine_R          | First-order-LocalRangeMin  |
|                  | AAL_048 | Lingual_R            | First-order-80Percentile   |
|                  | AAL_049 | Occipital_Sup_L      | First-order-Energy         |
|                  | AAL_049 | Occipital_Sup_L      | First-order-LocalRangeMean |
|                  | AAL_049 | Occipital_Sup_L      | First-order-70Percentile   |
|                  | AAL_051 | Occipital_Mid_L      | Texture-NIDM-Busyness      |
|                  | AAL_063 | SupraMarginal_L      | MedianAbsoluteDeviation    |
|                  | AAL_069 | Paracentral_Lobule_L | First-order-0.975Quantile  |
|                  | AAL_071 | Caudate_L            | First-order-LocalStdMin    |
|                  | AAL_095 | Cerebellum_3_L       | First-order-0.975Quantile  |
|                  | AAL_109 | Vermis_1_2           | First-order-Skewness       |
|                  | --      | --                   | Gender                     |

AAL: automated anatomical labeling; DK: Desikan-Killiany; GLCM: gray-level co-occurrence matrix; GLRLM: gray-level run length matrix; IQ: intelligence quotient; NIDM: Neighbor Intensity Difference Matrix.
